# Supplementary material
Source: PubMed Central journal article supplement (PMC4342326)
Supplement: NIHMS654214-supplement-1.pdf [file NIHMS654214-supplement-1.pdf]

## **SUPPLEMENTAL MATERIAL**

Supplement to: *Comparative risk of ischemic stroke among users of clopidogrel together with individual proton pump inhibitors*

## Supplemental Tables

**Supplemental Table I.** Characteristics of clopidogrel users, by proton pump inhibitor exposure group

|                                               |                                           | <b>Pantoprazole</b> | <b>Esomeprazole</b> |            |             |                  | <b>Lansoprazole</b> |             |                  | <b>Omeprazole</b> |             |                  | <b>Rabeprazole</b> |             |  |
|-----------------------------------------------|-------------------------------------------|---------------------|---------------------|------------|-------------|------------------|---------------------|-------------|------------------|-------------------|-------------|------------------|--------------------|-------------|--|
|                                               |                                           | <b>N</b>            | <b>N</b>            |            |             |                  | <b>N</b>            |             |                  | <b>N</b>          |             |                  | <b>N</b>           |             |  |
| Users, concomitant with clopidogrel           |                                           | 57,089              | 59,821              |            |             |                  | 106,470             |             |                  | 88,069            |             |                  | 14,110             |             |  |
| Person-years of follow-up                     |                                           | 12,057              | 13,359              |            |             |                  | 23,185              |             |                  | 18,791            |             |                  | 2,882              |             |  |
| Acute ischemic stroke events                  |                                           | 350                 | 238                 |            |             |                  | 617                 |             |                  | 408               |             |                  | 54                 |             |  |
| <b>Characteristic</b>                         | <b>Group</b>                              | <b>%</b>            | <b>%</b>            | <b>SMD</b> | <b>WCSD</b> | <b>%</b>         | <b>SMD</b>          | <b>WCSD</b> | <b>%</b>         | <b>SMD</b>        | <b>WCSD</b> | <b>%</b>         | <b>SMD</b>         | <b>WCSD</b> |  |
| <i>Demographic factors</i>                    |                                           |                     |                     |            |             |                  |                     |             |                  |                   |             |                  |                    |             |  |
| Method of cohort entry                        | clopidogrel added to ongoing PPI therapy  | 35.1                | 44.0                | 0.18       | 0.13        | 44.5             | 0.19                | 0.16        | 38.2             | 0.06              | 0.10        | 42.5             | 0.15               | 0.13        |  |
|                                               | clopidogrel and PPI initiated on same day | 30.6                | 18.9                | 0.27       | 0.22        | 21.1             | 0.22                | 0.17        | 19.7             | 0.25              | 0.21        | 18.0             | 0.30               | 0.25        |  |
|                                               | PPI added to ongoing clopidogrel therapy  | 34.3                | 37.2                | 0.06       | 0.08        | 34.5             | 0.00                | 0.06        | 42.1             | 0.16              | 0.11        | 39.5             | 0.11               | 0.10        |  |
| Age at cohort entry (continuous) <sup>†</sup> | Median (Q1-Q3)                            | 72.0 (62.4-80.2)    | 69.7 (59.8-77.5)    | 0.19       | 0.13        | 71.5 (62.1-79.5) | 0.04                | 0.09        | 72.0 (62.4-80.2) | 0.00              | 0.11        | 71.5 (62.1-79.5) | 0.04               | 0.11        |  |
| Age at cohort entry (deciles)                 | 1                                         | 8.5                 | 12.1                | 0.12       | 0.10        | 9.9              | 0.05                | 0.06        | 9.8              | 0.04              | 0.06        | 8.8              | 0.01               | 0.06        |  |
|                                               | 2                                         | 8.5                 | 12.0                | 0.11       | 0.08        | 9.9              | 0.05                | 0.07        | 9.8              | 0.04              | 0.07        | 8.8              | 0.01               | 0.04        |  |
|                                               | 3                                         | 8.6                 | 11.2                | 0.09       | 0.07        | 10.5             | 0.06                | 0.07        | 9.6              | 0.04              | 0.07        | 9.3              | 0.03               | 0.02        |  |
|                                               | 4                                         | 9.5                 | 10.4                | 0.03       | 0.05        | 10.1             | 0.02                | 0.03        | 9.9              | 0.01              | 0.02        | 10.1             | 0.02               | 0.02        |  |
|                                               | 5                                         | 9.7                 | 10.6                | 0.03       | 0.04        | 9.9              | 0.01                | 0.03        | 9.8              | 0.00              | 0.03        | 11.1             | 0.04               | 0.03        |  |

|                                         |                    |      |      |      |      |      |      |      |      |      |      |      |      |      |
|-----------------------------------------|--------------------|------|------|------|------|------|------|------|------|------|------|------|------|------|
|                                         | 6                  | 10.0 | 10.1 | 0.00 | 0.03 | 9.9  | 0.00 | 0.04 | 9.6  | 0.01 | 0.03 | 11.8 | 0.06 | 0.01 |
|                                         | 7                  | 10.4 | 9.7  | 0.03 | 0.05 | 10.0 | 0.01 | 0.04 | 9.8  | 0.02 | 0.04 | 10.8 | 0.01 | 0.01 |
|                                         | 8                  | 11.1 | 9.0  | 0.07 | 0.04 | 9.8  | 0.04 | 0.03 | 10.0 | 0.04 | 0.03 | 10.7 | 0.01 | 0.01 |
|                                         | 9                  | 11.5 | 8.3  | 0.11 | 0.04 | 9.9  | 0.05 | 0.04 | 10.4 | 0.03 | 0.04 | 9.8  | 0.05 | 0.03 |
|                                         | 10                 | 12.1 | 6.6  | 0.19 | 0.03 | 10.0 | 0.07 | 0.05 | 11.2 | 0.03 | 0.06 | 8.8  | 0.11 | 0.07 |
| Sex                                     | female             | 63.9 | 62.7 | 0.03 | 0.06 | 64.3 | 0.01 | 0.02 | 63.0 | 0.02 | 0.01 | 64.8 | 0.02 | 0.02 |
| Race†                                   | white              | 49.6 | 44.8 | 0.10 | 0.16 | 46.8 | 0.06 | 0.03 | 48.7 | 0.02 | 0.13 | 44.1 | 0.11 | 0.09 |
|                                         | black              | 14.3 | 12.7 | 0.05 | 0.12 | 13.2 | 0.03 | 0.09 | 13.2 | 0.03 | 0.06 | 9.0  | 0.17 | 0.08 |
|                                         | other /<br>unknown | 36.0 | 42.5 | 0.13 | 0.16 | 40.0 | 0.08 | 0.08 | 38.2 | 0.04 | 0.14 | 47.0 | 0.22 | 0.08 |
| State of residence†                     | CA                 | 39.1 | 32.5 | 0.14 | 0.22 | 34.4 | 0.10 | 0.06 | 32.4 | 0.14 | 0.16 | 45.4 | 0.13 | 0.14 |
|                                         | FL                 | 15.9 | 12.3 | 0.10 | 0.13 | 26.1 | 0.25 | 0.12 | 12.4 | 0.10 | 0.17 | 10.0 | 0.17 | 0.20 |
|                                         | NY                 | 27.6 | 36.8 | 0.20 | 0.26 | 23.1 | 0.10 | 0.25 | 32.4 | 0.10 | 0.17 | 33.5 | 0.13 | 0.20 |
|                                         | OH                 | 6.7  | 14.3 | 0.25 | 0.13 | 11.2 | 0.16 | 0.17 | 8.3  | 0.06 | 0.14 | 6.6  | 0.00 | 0.11 |
|                                         | PA                 | 10.7 | 4.1  | 0.25 | 0.09 | 5.1  | 0.21 | 0.07 | 14.5 | 0.12 | 0.10 | 4.5  | 0.24 | 0.07 |
| Calendar year of cohort<br>entry†       | 2000/2001          | 5.0  | 1.2  | 0.22 | 0.01 | 14.6 | 0.33 | 0.01 | 12.5 | 0.27 | 0.01 | 17.8 | 0.41 | 0.01 |
|                                         | 2002               | 12.9 | 5.0  | 0.28 | 0.11 | 11.2 | 0.05 | 0.11 | 4.0  | 0.32 | 0.19 | 17.7 | 0.14 | 0.15 |
|                                         | 2003               | 14.9 | 7.5  | 0.24 | 0.10 | 15.6 | 0.02 | 0.10 | 3.4  | 0.41 | 0.07 | 13.6 | 0.04 | 0.05 |
|                                         | 2004               | 15.8 | 9.8  | 0.18 | 0.16 | 10.4 | 0.16 | 0.07 | 3.9  | 0.41 | 0.13 | 14.9 | 0.02 | 0.09 |
|                                         | 2005               | 7.1  | 16.1 | 0.28 | 0.29 | 16.2 | 0.28 | 0.08 | 5.8  | 0.05 | 0.23 | 7.1  | 0.00 | 0.03 |
|                                         | 2006               | 13.8 | 17.1 | 0.09 | 0.20 | 12.8 | 0.03 | 0.12 | 16.9 | 0.09 | 0.19 | 9.4  | 0.14 | 0.11 |
|                                         | 2007               | 12.0 | 15.5 | 0.10 | 0.13 | 9.5  | 0.08 | 0.08 | 16.1 | 0.12 | 0.20 | 8.4  | 0.12 | 0.11 |
|                                         | 2008               | 9.0  | 13.3 | 0.14 | 0.05 | 4.8  | 0.16 | 0.03 | 16.3 | 0.22 | 0.09 | 6.4  | 0.10 | 0.06 |
|                                         | 2009               | 9.5  | 14.6 | 0.16 | 0.08 | 4.9  | 0.18 | 0.07 | 21.1 | 0.33 | 0.08 | 4.8  | 0.18 | 0.06 |
| CMS dual-eligible†                      | Yes                | 84.5 | 72.6 | 0.29 | 0.24 | 76.6 | 0.20 | 0.22 | 80.3 | 0.11 | 0.20 | 80.9 | 0.10 | 0.08 |
| <b><i>Health system use factors</i></b> |                    |      |      |      |      |      |      |      |      |      |      |      |      |      |

|                                                                      |                |               |               |      |      |               |      |      |               |      |      |               |      |      |
|----------------------------------------------------------------------|----------------|---------------|---------------|------|------|---------------|------|------|---------------|------|------|---------------|------|------|
| ACS hospitalization 29 days prior to cohort entry                    | Yes            | 15.5          | 8.8           | 0.21 | 0.17 | 10.6          | 0.14 | 0.09 | 9.2           | 0.19 | 0.11 | 7.5           | 0.25 | 0.15 |
| Nursing home residence, ever during baseline†                        | Yes            | 31.5          | 15.2          | 0.39 | 0.08 | 25.4          | 0.14 | 0.15 | 27.2          | 0.10 | 0.11 | 13.1          | 0.45 | 0.11 |
| # circulatory system hospitalizations in prior year (continuous)     | Median (Q1-Q3) | 0.0 (0.0-1.0) | 0.0 (0.0-1.0) | 0.03 | 0.17 | 0.0 (0.0-1.0) | 0.08 | 0.15 | 0.0 (0.0-1.0) | 0.00 | 0.14 | 0.0 (0.0-1.0) | 0.08 | 0.19 |
| # circulatory system hospitalizations in prior year†                 | 0              | 46.2          | 62.3          | 0.33 | 0.26 | 57.8          | 0.23 | 0.15 | 60.5          | 0.29 | 0.16 | 64.7          | 0.38 | 0.22 |
|                                                                      | 1              | 33.4          | 26.1          | 0.16 | 0.19 | 27.7          | 0.12 | 0.08 | 27.3          | 0.13 | 0.11 | 24.3          | 0.20 | 0.15 |
|                                                                      | 2              | 12.7          | 7.9           | 0.16 | 0.14 | 9.5           | 0.10 | 0.07 | 8.4           | 0.14 | 0.08 | 7.6           | 0.17 | 0.11 |
|                                                                      | 3+             | 7.7           | 3.7           | 0.17 | 0.12 | 5.0           | 0.11 | 0.09 | 3.8           | 0.17 | 0.09 | 3.4           | 0.19 | 0.13 |
| # non-circulatory system hospitalizations in prior year (continuous) | Median (Q1-Q3) | 0.0 (0.0-1.0) | 0.0 (0.0-1.0) | 0.06 | 0.15 | 0.0 (0.0-1.0) | 0.07 | 0.13 | 0.0 (0.0-1.0) | 0.00 | 0.14 | 0.0 (0.0-1.0) | 0.07 | 0.22 |
| # non-circulatory system hospitalizations in prior year†             | 0              | 48.5          | 67.1          | 0.38 | 0.24 | 60.1          | 0.23 | 0.13 | 63.0          | 0.29 | 0.16 | 70.4          | 0.46 | 0.18 |
|                                                                      | 1              | 26.8          | 19.6          | 0.17 | 0.18 | 22.1          | 0.11 | 0.08 | 21.1          | 0.13 | 0.12 | 18.7          | 0.19 | 0.14 |
|                                                                      | 2              | 12.4          | 7.0           | 0.18 | 0.12 | 9.0           | 0.11 | 0.05 | 8.4           | 0.13 | 0.08 | 6.2           | 0.22 | 0.08 |
|                                                                      | 3+             | 12.2          | 6.2           | 0.21 | 0.15 | 8.7           | 0.11 | 0.10 | 7.4           | 0.16 | 0.10 | 4.7           | 0.27 | 0.14 |
| # circulatory system ED visits in prior year (continuous)            | Median (Q1-Q3) | 0.0 (0.0-1.0) | 0.0 (0.0-1.0) | 0.00 | 0.01 | 0.0 (0.0-1.0) | 0.03 | 0.03 | 0.0 (0.0-1.0) | 0.00 | 0.03 | 0.0 (0.0-1.0) | 0.03 | 0.04 |
| # circulatory system ED visits in prior year†                        | 0              | 58.3          | 72.6          | 0.31 | 0.20 | 67.3          | 0.19 | 0.14 | 70.3          | 0.25 | 0.15 | 74.7          | 0.35 | 0.15 |
|                                                                      | 1              | 24.9          | 18.1          | 0.17 | 0.15 | 20.9          | 0.10 | 0.08 | 19.4          | 0.13 | 0.09 | 17.1          | 0.19 | 0.11 |
|                                                                      | 2              | 9.3           | 5.5           | 0.15 | 0.11 | 6.7           | 0.09 | 0.06 | 6.2           | 0.12 | 0.09 | 4.6           | 0.18 | 0.08 |
|                                                                      | 3+             | 7.5           | 3.8           | 0.16 | 0.10 | 5.1           | 0.10 | 0.07 | 4.1           | 0.14 | 0.08 | 3.5           | 0.18 | 0.09 |
| # non-circulatory system ED visits in prior year (continuous)        | Median (Q1-Q3) | 1.0 (0.0-2.0) | 1.0 (0.0-2.0) | 0.01 | 0.06 | 1.0 (0.0-2.0) | 0.05 | 0.07 | 1.0 (0.0-2.0) | 0.00 | 0.06 | 1.0 (0.0-2.0) | 0.05 | 0.08 |
| # non-circulatory system                                             | 0              | 30.0          | 45.6          | 0.33 | 0.22 | 39.6          | 0.20 | 0.16 | 44.1          | 0.29 | 0.12 | 49.6          | 0.41 | 0.16 |

|                                                                       |                |                  |                  |      |      |                  |      |      |                  |      |      |                  |      |      |
|-----------------------------------------------------------------------|----------------|------------------|------------------|------|------|------------------|------|------|------------------|------|------|------------------|------|------|
| ED visits in prior year†                                              | 1              | 23.1             | 21.6             | 0.04 | 0.11 | 22.5             | 0.01 | 0.05 | 21.2             | 0.05 | 0.05 | 21.5             | 0.04 | 0.10 |
|                                                                       | 2              | 15.5             | 12.1             | 0.10 | 0.09 | 13.5             | 0.06 | 0.04 | 12.7             | 0.08 | 0.05 | 12.0             | 0.10 | 0.08 |
|                                                                       | 3+             | 31.4             | 20.7             | 0.25 | 0.16 | 24.4             | 0.16 | 0.11 | 22.1             | 0.21 | 0.13 | 17.0             | 0.34 | 0.13 |
| # circulatory system outpatient visits in prior year (continuous)     | Median (Q1-Q3) | 6.0 (2.0-13.0)   | 7.0 (3.0-13.0)   | 0.07 | 0.04 | 8.0 (4.0-15.0)   | 0.08 | 0.06 | 6.0 (2.0-13.0)   | 0.00 | 0.05 | 8.0 (4.0-15.0)   | 0.08 | 0.06 |
| # circulatory system outpatient visits in prior year (deciles)†       | 1              | 12.6             | 15.6             | 0.09 | 0.08 | 11.8             | 0.03 | 0.14 | 20.6             | 0.21 | 0.07 | 14.5             | 0.05 | 0.12 |
|                                                                       | 2              | 4.8              | 6.8              | 0.09 | 0.03 | 6.0              | 0.05 | 0.02 | 6.2              | 0.06 | 0.03 | 6.3              | 0.07 | 0.02 |
|                                                                       | 3              | 10.5             | 14.0             | 0.11 | 0.04 | 12.7             | 0.07 | 0.03 | 12.6             | 0.07 | 0.03 | 13.9             | 0.10 | 0.03 |
|                                                                       | 4              | 10.8             | 12.7             | 0.06 | 0.02 | 12.2             | 0.04 | 0.02 | 11.6             | 0.03 | 0.02 | 13.1             | 0.07 | 0.03 |
|                                                                       | 5              | 5.0              | 5.9              | 0.04 | 0.01 | 5.6              | 0.03 | 0.01 | 5.0              | 0.00 | 0.02 | 5.9              | 0.04 | 0.02 |
|                                                                       | 6              | 9.1              | 9.4              | 0.01 | 0.02 | 9.6              | 0.02 | 0.01 | 8.6              | 0.02 | 0.02 | 10.0             | 0.03 | 0.02 |
|                                                                       | 7              | 11.4             | 10.2             | 0.04 | 0.05 | 11.1             | 0.01 | 0.03 | 9.7              | 0.06 | 0.04 | 10.7             | 0.02 | 0.03 |
|                                                                       | 8              | 11.0             | 8.2              | 0.09 | 0.06 | 9.9              | 0.03 | 0.04 | 8.4              | 0.09 | 0.06 | 9.0              | 0.07 | 0.04 |
|                                                                       | 9              | 13.2             | 8.3              | 0.16 | 0.07 | 11.0             | 0.07 | 0.07 | 9.4              | 0.12 | 0.08 | 8.3              | 0.16 | 0.06 |
|                                                                       | 10             | 11.6             | 8.9              | 0.09 | 0.05 | 10.2             | 0.04 | 0.07 | 7.8              | 0.13 | 0.06 | 8.2              | 0.11 | 0.07 |
| # non-circulatory system outpatient visits in prior year (continuous) | Median (Q1-Q3) | 23.0 (10.0-45.0) | 26.0 (14.0-52.0) | 0.14 | 0.11 | 28.0 (15.0-52.0) | 0.10 | 0.12 | 23.0 (10.0-45.0) | 0.00 | 0.10 | 28.0 (15.0-52.0) | 0.10 | 0.14 |
| # non-circulatory system outpatient visits in prior year (deciles)†   | 1              | 10.2             | 9.4              | 0.03 | 0.09 | 7.0              | 0.11 | 0.10 | 15.8             | 0.17 | 0.06 | 8.9              | 0.04 | 0.11 |
|                                                                       | 2              | 9.8              | 11.2             | 0.05 | 0.06 | 10.3             | 0.02 | 0.04 | 11.5             | 0.06 | 0.05 | 12.5             | 0.09 | 0.08 |
|                                                                       | 3              | 9.7              | 10.8             | 0.04 | 0.05 | 10.4             | 0.02 | 0.03 | 10.3             | 0.02 | 0.03 | 12.3             | 0.08 | 0.06 |
|                                                                       | 4              | 9.7              | 10.2             | 0.02 | 0.02 | 10.3             | 0.02 | 0.01 | 9.5              | 0.01 | 0.01 | 10.9             | 0.04 | 0.04 |
|                                                                       | 5              | 8.6              | 8.7              | 0.00 | 0.01 | 9.2              | 0.02 | 0.01 | 8.2              | 0.01 | 0.01 | 9.9              | 0.05 | 0.03 |
|                                                                       | 6              | 10.0             | 9.8              | 0.01 | 0.03 | 10.5             | 0.01 | 0.02 | 9.2              | 0.03 | 0.02 | 10.4             | 0.01 | 0.02 |
|                                                                       | 7              | 10.5             | 9.4              | 0.04 | 0.03 | 11.0             | 0.01 | 0.03 | 9.4              | 0.04 | 0.03 | 10.1             | 0.01 | 0.02 |
|                                                                       | 8              | 10.4             | 8.8              | 0.05 | 0.05 | 10.6             | 0.01 | 0.04 | 8.6              | 0.06 | 0.05 | 9.1              | 0.05 | 0.07 |

|                                                      |                |                  |                  |      |      |                  |      |      |                  |      |      |                  |      |      |
|------------------------------------------------------|----------------|------------------|------------------|------|------|------------------|------|------|------------------|------|------|------------------|------|------|
|                                                      | 9              | 11.1             | 9.5              | 0.05 | 0.06 | 10.6             | 0.02 | 0.07 | 8.9              | 0.08 | 0.06 | 8.2              | 0.10 | 0.10 |
|                                                      | 10             | 9.9              | 12.2             | 0.08 | 0.10 | 10.1             | 0.01 | 0.09 | 8.7              | 0.04 | 0.07 | 7.7              | 0.07 | 0.08 |
| # unique drugs prescribed in prior year (continuous) | Median (Q1-Q3) | 16.0 (11.0-23.0) | 18.0 (13.0-25.0) | 0.20 | 0.12 | 18.0 (13.0-24.0) | 0.17 | 0.08 | 16.0 (11.0-23.0) | 0.00 | 0.08 | 18.0 (13.0-24.0) | 0.17 | 0.09 |
| # unique drugs prescribed in prior year (deciles)    | 1              | 13.6             | 9.9              | 0.12 | 0.05 | 9.8              | 0.12 | 0.03 | 13.6             | 0.00 | 0.03 | 10.0             | 0.11 | 0.05 |
|                                                      | 2              | 11.0             | 10.2             | 0.03 | 0.05 | 10.2             | 0.03 | 0.04 | 12.0             | 0.03 | 0.04 | 11.1             | 0.00 | 0.04 |
|                                                      | 3              | 9.1              | 8.3              | 0.03 | 0.04 | 8.7              | 0.01 | 0.02 | 9.5              | 0.02 | 0.02 | 8.7              | 0.01 | 0.02 |
|                                                      | 4              | 9.4              | 9.2              | 0.01 | 0.03 | 9.6              | 0.00 | 0.01 | 10.1             | 0.02 | 0.03 | 9.4              | 0.00 | 0.03 |
|                                                      | 5              | 9.2              | 9.1              | 0.00 | 0.04 | 9.8              | 0.02 | 0.01 | 9.7              | 0.02 | 0.02 | 9.5              | 0.01 | 0.01 |
|                                                      | 6              | 12.9             | 13.4             | 0.02 | 0.01 | 13.3             | 0.01 | 0.01 | 12.9             | 0.00 | 0.02 | 13.4             | 0.02 | 0.02 |
|                                                      | 7              | 7.1              | 7.8              | 0.02 | 0.02 | 7.7              | 0.02 | 0.01 | 7.1              | 0.00 | 0.01 | 7.7              | 0.02 | 0.02 |
|                                                      | 8              | 8.9              | 9.8              | 0.03 | 0.03 | 9.7              | 0.03 | 0.03 | 8.6              | 0.01 | 0.03 | 9.3              | 0.01 | 0.02 |
|                                                      | 9              | 9.5              | 10.7             | 0.04 | 0.03 | 10.7             | 0.04 | 0.03 | 8.8              | 0.02 | 0.03 | 10.6             | 0.04 | 0.04 |
|                                                      | 10             | 9.2              | 11.6             | 0.08 | 0.09 | 10.5             | 0.05 | 0.06 | 7.7              | 0.05 | 0.06 | 10.2             | 0.04 | 0.07 |
| <b><i>Diseases and Procedures</i></b>                |                |                  |                  |      |      |                  |      |      |                  |      |      |                  |      |      |
| Alcohol abuse                                        | Yes            | 8.3              | 8.8              | 0.02 | 0.04 | 7.5              | 0.03 | 0.02 | 7.6              | 0.02 | 0.02 | 6.1              | 0.08 | 0.07 |
| Angina pectoris                                      | Yes            | 46.0             | 48.2             | 0.04 | 0.10 | 45.4             | 0.01 | 0.07 | 41.0             | 0.10 | 0.08 | 45.8             | 0.00 | 0.09 |
| Artery, arteriole, capillary disease                 | Yes            | 62.3             | 58.3             | 0.08 | 0.10 | 60.4             | 0.04 | 0.08 | 57.0             | 0.11 | 0.10 | 54.2             | 0.16 | 0.10 |
| Asthma, COPD, or emphysema                           | Yes            | 55.2             | 54.7             | 0.01 | 0.08 | 54.9             | 0.01 | 0.06 | 50.5             | 0.09 | 0.08 | 49.6             | 0.11 | 0.09 |
| Cancer                                               | Yes            | 30.4             | 30.0             | 0.01 | 0.06 | 29.2             | 0.02 | 0.04 | 27.9             | 0.05 | 0.07 | 29.6             | 0.02 | 0.04 |
| Cerebrovascular disease, CAO and stenosis            | Yes            | 31.9             | 30.9             | 0.02 | 0.08 | 31.7             | 0.00 | 0.08 | 27.8             | 0.09 | 0.08 | 29.1             | 0.06 | 0.06 |
| Cerebrovascular disease, hemorrhage                  | Yes            | 4.4              | 3.0              | 0.08 | 0.02 | 3.7              | 0.04 | 0.03 | 3.6              | 0.04 | 0.03 | 2.7              | 0.09 | 0.03 |
| Cerebrovascular disease, ischemic stroke             | Yes            | 40.2             | 29.5             | 0.23 | 0.04 | 36.8             | 0.07 | 0.07 | 34.6             | 0.12 | 0.04 | 31.6             | 0.18 | 0.09 |

|                                                      |     |      |      |      |      |      |      |      |      |      |      |      |      |      |
|------------------------------------------------------|-----|------|------|------|------|------|------|------|------|------|------|------|------|------|
| Cerebrovascular disease, other                       | Yes | 52.3 | 46.5 | 0.11 | 0.07 | 50.6 | 0.03 | 0.04 | 47.0 | 0.10 | 0.07 | 45.8 | 0.13 | 0.08 |
| Cerebrovascular disease, other (w/o CAO or stenosis) | Yes | 39.3 | 31.1 | 0.17 | 0.05 | 35.1 | 0.09 | 0.05 | 35.2 | 0.08 | 0.06 | 30.9 | 0.18 | 0.07 |
| Cerebrovascular disease, transient cerebral ischemia | Yes | 29.6 | 25.4 | 0.10 | 0.05 | 29.1 | 0.01 | 0.04 | 26.3 | 0.07 | 0.05 | 26.4 | 0.07 | 0.05 |
| Cardiac dysrhythmias, all                            | Yes | 61.4 | 54.1 | 0.15 | 0.10 | 55.8 | 0.11 | 0.07 | 53.2 | 0.17 | 0.10 | 51.9 | 0.19 | 0.09 |
| Cardiac dysrhythmias, atrial fibrillation or flutter | Yes | 28.9 | 20.0 | 0.21 | 0.08 | 22.4 | 0.15 | 0.05 | 23.0 | 0.13 | 0.09 | 19.8 | 0.21 | 0.06 |
| Cardiac dysrhythmias, other                          | Yes | 55.2 | 49.7 | 0.11 | 0.09 | 50.6 | 0.09 | 0.07 | 47.4 | 0.16 | 0.10 | 47.1 | 0.16 | 0.09 |
| Cardiovascular system symptoms†                      | Yes | 53.9 | 55.7 | 0.04 | 0.10 | 53.7 | 0.01 | 0.10 | 48.7 | 0.11 | 0.11 | 50.5 | 0.07 | 0.11 |
| Circulatory system disease, other                    | Yes | 96.9 | 97.2 | 0.02 | 0.04 | 97.7 | 0.05 | 0.06 | 95.3 | 0.08 | 0.06 | 96.8 | 0.00 | 0.08 |
| Conduction disorder                                  | Yes | 19.3 | 13.9 | 0.15 | 0.06 | 15.3 | 0.11 | 0.03 | 15.5 | 0.10 | 0.07 | 13.3 | 0.16 | 0.04 |
| Congenital anomaly of heart                          | Yes | 14.2 | 12.4 | 0.05 | 0.06 | 13.1 | 0.03 | 0.06 | 11.1 | 0.09 | 0.06 | 11.9 | 0.07 | 0.03 |
| Diabetes mellitus                                    | Yes | 67.2 | 67.4 | 0.00 | 0.08 | 65.4 | 0.04 | 0.06 | 65.3 | 0.04 | 0.05 | 62.5 | 0.10 | 0.07 |
| Disorder of stomach and duodenum, other*             | Yes | 4.7  | 4.8  | 0.01 | 0.03 | 4.0  | 0.03 | 0.02 | 3.9  | 0.04 | 0.05 | 4.4  | 0.02 | 0.02 |
| Dyspepsia and other disorders of stomach function*   | Yes | 20.6 | 24.7 | 0.10 | 0.07 | 23.5 | 0.07 | 0.04 | 19.9 | 0.02 | 0.05 | 23.9 | 0.08 | 0.06 |
| Esophageal disease*                                  | Yes | 51.3 | 58.3 | 0.14 | 0.10 | 52.7 | 0.03 | 0.03 | 52.2 | 0.02 | 0.10 | 54.4 | 0.06 | 0.09 |
| Gastrin secretion abnormality*                       | Yes | 0.0  | 0.0  | 0.00 | 0.01 | 0.0  | 0.01 | 0.01 | 0.0  | 0.01 | 0.01 | 0.0  | 0.01 | 0.01 |
| Gastritis/duodenitis*                                | Yes | 42.7 | 49.4 | 0.13 | 0.09 | 47.4 | 0.09 | 0.05 | 39.6 | 0.06 | 0.08 | 49.0 | 0.13 | 0.09 |
| Heart failure or cardiomyopathy†                     | Yes | 63.9 | 52.9 | 0.22 | 0.12 | 56.7 | 0.15 | 0.10 | 53.5 | 0.21 | 0.12 | 49.7 | 0.29 | 0.11 |

|                                                         |     |      |      |      |      |      |      |      |      |      |      |      |      |      |
|---------------------------------------------------------|-----|------|------|------|------|------|------|------|------|------|------|------|------|------|
| HIV/AIDS                                                | Yes | 1.9  | 2.4  | 0.04 | 0.05 | 2.2  | 0.02 | 0.03 | 1.6  | 0.02 | 0.02 | 1.2  | 0.06 | 0.04 |
| Hypertension                                            | Yes | 93.1 | 93.7 | 0.02 | 0.06 | 93.5 | 0.01 | 0.07 | 91.1 | 0.08 | 0.05 | 92.3 | 0.03 | 0.09 |
| Hypothyroidism                                          | Yes | 37.0 | 38.2 | 0.02 | 0.10 | 36.3 | 0.01 | 0.07 | 34.8 | 0.05 | 0.08 | 37.4 | 0.01 | 0.08 |
| Ischemic heart disease†                                 | Yes | 82.4 | 79.0 | 0.08 | 0.11 | 78.5 | 0.10 | 0.09 | 76.8 | 0.14 | 0.09 | 76.7 | 0.14 | 0.09 |
| Lipoid metabolism disorder†                             | Yes | 80.5 | 86.4 | 0.16 | 0.11 | 79.6 | 0.02 | 0.11 | 79.9 | 0.01 | 0.08 | 81.9 | 0.04 | 0.09 |
| Mental disorder, depression                             | Yes | 42.2 | 44.0 | 0.04 | 0.08 | 44.8 | 0.05 | 0.05 | 41.6 | 0.01 | 0.04 | 36.0 | 0.13 | 0.10 |
| Mental disorder, other†                                 | Yes | 61.4 | 60.3 | 0.02 | 0.07 | 60.8 | 0.01 | 0.04 | 58.9 | 0.05 | 0.05 | 51.8 | 0.19 | 0.12 |
| MI, acute†                                              | Yes | 37.0 | 26.6 | 0.23 | 0.14 | 27.8 | 0.20 | 0.07 | 28.2 | 0.19 | 0.10 | 23.5 | 0.30 | 0.10 |
| MI, old                                                 | Yes | 25.0 | 18.8 | 0.15 | 0.10 | 19.5 | 0.13 | 0.05 | 20.7 | 0.10 | 0.06 | 16.7 | 0.20 | 0.09 |
| Nervous system disease, disorders of the eye and adnexa | Yes | 81.1 | 84.9 | 0.10 | 0.05 | 83.7 | 0.07 | 0.05 | 78.9 | 0.05 | 0.06 | 83.5 | 0.06 | 0.06 |
| Nervous system disease, hereditary and degenerative     | Yes | 28.4 | 23.0 | 0.12 | 0.07 | 25.7 | 0.06 | 0.04 | 25.8 | 0.06 | 0.05 | 21.2 | 0.17 | 0.10 |
| Nervous system disease: inflammatory disease            | Yes | 1.5  | 1.2  | 0.02 | 0.03 | 1.3  | 0.02 | 0.03 | 1.3  | 0.02 | 0.02 | 0.8  | 0.06 | 0.04 |
| Nervous system disease, other†                          | Yes | 33.7 | 29.1 | 0.10 | 0.06 | 31.7 | 0.04 | 0.05 | 29.6 | 0.09 | 0.05 | 26.2 | 0.16 | 0.11 |
| Nervous system disease, peripheral                      | Yes | 37.3 | 41.0 | 0.08 | 0.07 | 37.2 | 0.00 | 0.07 | 35.8 | 0.03 | 0.08 | 35.1 | 0.05 | 0.08 |
| Obesity                                                 | Yes | 20.0 | 20.5 | 0.01 | 0.06 | 18.0 | 0.05 | 0.03 | 19.6 | 0.01 | 0.04 | 14.6 | 0.14 | 0.08 |
| Pulmonary congestion or hypostasis                      | Yes | 19.9 | 12.0 | 0.22 | 0.10 | 15.0 | 0.13 | 0.07 | 14.6 | 0.14 | 0.08 | 9.0  | 0.32 | 0.08 |
| Pacemaker/ICD                                           | Yes | 5.5  | 3.5  | 0.10 | 0.06 | 3.8  | 0.08 | 0.04 | 4.0  | 0.07 | 0.05 | 3.2  | 0.11 | 0.04 |
| Renal disease, acute†                                   | Yes | 21.3 | 12.5 | 0.24 | 0.14 | 13.8 | 0.20 | 0.07 | 15.3 | 0.16 | 0.11 | 8.5  | 0.37 | 0.13 |
| Renal disease, chronic†                                 | Yes | 24.2 | 16.6 | 0.19 | 0.11 | 16.5 | 0.19 | 0.08 | 19.4 | 0.12 | 0.12 | 12.2 | 0.32 | 0.13 |



|                                                     |     |      |      |      |      |      |      |      |      |      |      |      |      |      |
|-----------------------------------------------------|-----|------|------|------|------|------|------|------|------|------|------|------|------|------|
| Renal failure, other†                               | Yes | 47.1 | 41.5 | 0.11 | 0.09 | 41.3 | 0.12 | 0.07 | 39.6 | 0.15 | 0.10 | 35.9 | 0.23 | 0.12 |
| Stent, carotid or carotid revascularization         | Yes | 2.9  | 2.2  | 0.05 | 0.06 | 2.2  | 0.05 | 0.03 | 2.3  | 0.04 | 0.04 | 2.1  | 0.05 | 0.05 |
| Stent, coronary†                                    | Yes | 25.7 | 23.3 | 0.05 | 0.18 | 19.4 | 0.15 | 0.08 | 22.5 | 0.08 | 0.09 | 19.2 | 0.16 | 0.16 |
| Stent, other vascular†                              | Yes | 11.6 | 11.1 | 0.02 | 0.16 | 6.5  | 0.18 | 0.10 | 12.6 | 0.03 | 0.12 | 6.2  | 0.19 | 0.11 |
| Substance abuse†                                    | Yes | 19.4 | 21.1 | 0.04 | 0.12 | 17.1 | 0.06 | 0.04 | 18.8 | 0.02 | 0.05 | 12.9 | 0.18 | 0.12 |
| Tobacco use†                                        | Yes | 25.7 | 26.6 | 0.02 | 0.14 | 21.7 | 0.09 | 0.06 | 24.5 | 0.03 | 0.06 | 17.4 | 0.20 | 0.13 |
| Ulcer, duodenal, gastric, gastrojejunal, or peptic* | Yes | 24.3 | 25.6 | 0.03 | 0.06 | 24.8 | 0.01 | 0.05 | 20.9 | 0.08 | 0.08 | 27.9 | 0.08 | 0.08 |
| <b><i>Drug markers of chronic diseases</i></b>      |     |      |      |      |      |      |      |      |      |      |      |      |      |      |
| Antiadrenergic agent                                | Yes | 27.9 | 28.0 | 0.00 | 0.07 | 26.7 | 0.03 | 0.06 | 25.1 | 0.06 | 0.07 | 24.6 | 0.07 | 0.08 |
| Antialcohol agent                                   | Yes | 0.1  | 0.2  | 0.02 | 0.01 | 0.1  | 0.00 | 0.01 | 0.1  | 0.00 | 0.01 | 0.0  | 0.03 | 0.03 |
| Antiarrhythmic agent                                | Yes | 6.2  | 4.9  | 0.06 | 0.04 | 5.1  | 0.05 | 0.02 | 4.7  | 0.07 | 0.04 | 4.7  | 0.07 | 0.02 |
| Anticoagulant                                       | Yes | 16.7 | 12.3 | 0.13 | 0.08 | 13.7 | 0.08 | 0.04 | 14.0 | 0.08 | 0.06 | 10.2 | 0.19 | 0.07 |
| Anticonvulsant                                      | Yes | 12.6 | 13.1 | 0.02 | 0.05 | 13.2 | 0.02 | 0.04 | 12.3 | 0.01 | 0.01 | 10.4 | 0.07 | 0.07 |
| Antidepressant                                      | Yes | 55.1 | 59.4 | 0.09 | 0.06 | 59.0 | 0.08 | 0.03 | 55.4 | 0.01 | 0.02 | 53.4 | 0.03 | 0.05 |
| Antidiabetic agent, insulin                         | Yes | 23.5 | 18.8 | 0.12 | 0.06 | 20.7 | 0.07 | 0.07 | 21.8 | 0.04 | 0.04 | 14.5 | 0.23 | 0.09 |
| Antidiabetic agent, non-insulin                     | Yes | 40.1 | 40.0 | 0.00 | 0.05 | 38.4 | 0.04 | 0.03 | 39.8 | 0.01 | 0.01 | 35.7 | 0.09 | 0.04 |
| Agent for migraine                                  | Yes | 2.8  | 5.7  | 0.15 | 0.01 | 3.9  | 0.07 | 0.01 | 3.2  | 0.03 | 0.01 | 4.5  | 0.09 | 0.03 |
| Antiobesity agents                                  | Yes | 0.2  | 0.3  | 0.01 | 0.03 | 0.3  | 0.01 | 0.02 | 0.2  | 0.00 | 0.02 | 0.3  | 0.02 | 0.02 |
| Antiplatelet agent (excluding clopidogrel)          | Yes | 9.8  | 11.3 | 0.05 | 0.04 | 11.2 | 0.04 | 0.03 | 9.2  | 0.02 | 0.03 | 10.5 | 0.02 | 0.03 |
| Antipsychotic                                       | Yes | 23.4 | 24.2 | 0.02 | 0.06 | 25.7 | 0.05 | 0.03 | 22.5 | 0.02 | 0.03 | 19.9 | 0.08 | 0.09 |
| Antiretroviral agent                                | Yes | 0.8  | 1.2  | 0.04 | 0.06 | 1.0  | 0.02 | 0.02 | 0.7  | 0.01 | 0.02 | 0.6  | 0.03 | 0.03 |
| Aspirin (low dose)†                                 | Yes | 35.6 | 45.7 | 0.21 | 0.14 | 37.8 | 0.05 | 0.06 | 35.6 | 0.00 | 0.04 | 41.3 | 0.12 | 0.06 |

|                                                         |     |      |      |      |      |      |      |      |      |      |      |      |      |      |
|---------------------------------------------------------|-----|------|------|------|------|------|------|------|------|------|------|------|------|------|
| Beta-adrenergic or alpha/beta-adrenergic blocking agent | Yes | 66.5 | 67.9 | 0.03 | 0.08 | 61.9 | 0.09 | 0.04 | 66.8 | 0.01 | 0.04 | 61.2 | 0.11 | 0.03 |
| Bronchodilator or inhaled corticosteroid                | Yes | 45.6 | 49.5 | 0.08 | 0.05 | 46.8 | 0.02 | 0.03 | 44.7 | 0.02 | 0.04 | 43.2 | 0.05 | 0.06 |
| Calcium channel blocker                                 | Yes | 58.2 | 58.0 | 0.00 | 0.07 | 57.5 | 0.01 | 0.06 | 54.5 | 0.07 | 0.06 | 57.7 | 0.01 | 0.07 |
| Diuretic, loop                                          | Yes | 47.1 | 38.9 | 0.17 | 0.10 | 42.2 | 0.10 | 0.04 | 41.0 | 0.12 | 0.08 | 35.6 | 0.24 | 0.08 |
| Diuretic, other                                         | Yes | 47.9 | 53.4 | 0.11 | 0.05 | 47.6 | 0.01 | 0.04 | 47.9 | 0.00 | 0.04 | 47.4 | 0.01 | 0.04 |
| Fibrate                                                 | Yes | 10.4 | 13.5 | 0.10 | 0.05 | 11.1 | 0.02 | 0.03 | 11.3 | 0.03 | 0.02 | 11.2 | 0.03 | 0.01 |
| Inotropic agent                                         | Yes | 15.9 | 10.5 | 0.16 | 0.06 | 14.5 | 0.04 | 0.03 | 11.9 | 0.11 | 0.04 | 12.5 | 0.10 | 0.03 |
| Leukotriene inhibitor                                   | Yes | 10.5 | 17.0 | 0.19 | 0.03 | 12.6 | 0.06 | 0.04 | 11.0 | 0.02 | 0.03 | 13.2 | 0.08 | 0.05 |
| Potassium supplement                                    | Yes | 32.5 | 26.5 | 0.13 | 0.09 | 29.9 | 0.06 | 0.03 | 28.1 | 0.10 | 0.06 | 24.1 | 0.19 | 0.05 |
| Ranolazine                                              | Yes | 0.3  | 0.5  | 0.03 | 0.01 | 0.1  | 0.03 | 0.01 | 0.5  | 0.03 | 0.02 | 0.3  | 0.00 | 0.01 |
| Renin angiotensin system antagonist                     | Yes | 75.5 | 77.3 | 0.04 | 0.07 | 73.5 | 0.04 | 0.04 | 74.2 | 0.03 | 0.03 | 72.9 | 0.06 | 0.04 |
| Statin                                                  | Yes | 65.9 | 74.4 | 0.19 | 0.10 | 64.6 | 0.03 | 0.05 | 70.0 | 0.09 | 0.03 | 66.3 | 0.01 | 0.05 |
| Varenicline                                             | Yes | 0.7  | 1.9  | 0.11 | 0.02 | 0.6  | 0.01 | 0.02 | 1.6  | 0.09 | 0.01 | 0.3  | 0.05 | 0.03 |
| Vasodilator                                             | Yes | 52.5 | 50.1 | 0.05 | 0.08 | 50.4 | 0.04 | 0.04 | 48.2 | 0.09 | 0.06 | 50.7 | 0.04 | 0.06 |
| Thyroid hormone                                         | Yes | 15.6 | 14.1 | 0.04 | 0.05 | 14.0 | 0.05 | 0.03 | 15.1 | 0.02 | 0.03 | 13.4 | 0.06 | 0.01 |
| <b><i>Recent drug exposures</i></b>                     |     |      |      |      |      |      |      |      |      |      |      |      |      |      |
| Alpha/beta-adrenergic blocking agent                    | Yes | 7.1  | 7.2  | 0.00 | 0.05 | 5.8  | 0.05 | 0.03 | 7.1  | 0.00 | 0.04 | 4.9  | 0.09 | 0.04 |
| Antidepressant, MAOI / other                            | Yes | 3.2  | 4.1  | 0.05 | 0.03 | 4.0  | 0.04 | 0.03 | 3.9  | 0.04 | 0.03 | 3.4  | 0.01 | 0.03 |
| Antidepressant, SNRI                                    | Yes | 2.1  | 2.9  | 0.05 | 0.03 | 2.3  | 0.01 | 0.01 | 2.5  | 0.03 | 0.02 | 1.7  | 0.03 | 0.02 |
| Antidepressant, SSRI                                    | Yes | 13.2 | 13.7 | 0.02 | 0.05 | 15.4 | 0.06 | 0.03 | 14.1 | 0.03 | 0.04 | 12.3 | 0.03 | 0.07 |
| Antidepressant, tetracyclic                             | Yes | 2.0  | 1.4  | 0.05 | 0.05 | 2.1  | 0.00 | 0.04 | 2.3  | 0.02 | 0.04 | 1.4  | 0.04 | 0.04 |
| Antidepressant, tricyclic                               | Yes | 2.8  | 3.2  | 0.02 | 0.02 | 3.5  | 0.04 | 0.02 | 3.4  | 0.04 | 0.03 | 3.6  | 0.05 | 0.02 |

|                                                    |     |      |      |      |      |      |      |      |      |      |      |      |      |      |
|----------------------------------------------------|-----|------|------|------|------|------|------|------|------|------|------|------|------|------|
| Antidiabetic agent, thiazolidinedione              | Yes | 11.0 | 16.4 | 0.16 | 0.03 | 13.5 | 0.08 | 0.02 | 13.6 | 0.08 | 0.04 | 14.7 | 0.11 | 0.03 |
| Anti-infective agent                               | Yes | 39.7 | 40.7 | 0.02 | 0.06 | 41.7 | 0.04 | 0.03 | 37.9 | 0.04 | 0.05 | 39.8 | 0.00 | 0.04 |
| Antipsychotic, benzisoxazole                       | Yes | 2.1  | 1.7  | 0.03 | 0.04 | 2.6  | 0.03 | 0.03 | 2.0  | 0.01 | 0.03 | 1.4  | 0.05 | 0.02 |
| Antipsychotic, dibenzapine                         | Yes | 3.7  | 3.7  | 0.00 | 0.04 | 4.5  | 0.04 | 0.03 | 3.7  | 0.00 | 0.03 | 2.7  | 0.05 | 0.04 |
| Antipsychotic, phenothiazine                       | Yes | 1.0  | 0.9  | 0.02 | 0.02 | 1.1  | 0.00 | 0.01 | 1.1  | 0.00 | 0.01 | 1.0  | 0.01 | 0.01 |
| Antipsychotic, phenylbutylpiperadine               | Yes | 0.4  | 0.3  | 0.02 | 0.02 | 0.4  | 0.00 | 0.02 | 0.4  | 0.01 | 0.02 | 0.3  | 0.02 | 0.03 |
| Antipsychotic, quinolinone                         | Yes | 0.4  | 0.7  | 0.04 | 0.02 | 0.6  | 0.03 | 0.01 | 0.6  | 0.03 | 0.02 | 0.2  | 0.03 | 0.02 |
| Antipsychotic, thioxanthine                        | Yes | 0.0  | 0.0  | 0.00 | 0.01 | 0.1  | 0.00 | 0.01 | 0.1  | 0.00 | 0.01 | 0.1  | 0.01 | 0.02 |
| Aspirin                                            | Yes | 12.3 | 13.3 | 0.03 | 0.07 | 14.3 | 0.06 | 0.05 | 10.9 | 0.04 | 0.05 | 14.3 | 0.06 | 0.09 |
| Beta-adrenergic blocking agent                     | Yes | 26.9 | 28.3 | 0.03 | 0.04 | 26.5 | 0.01 | 0.03 | 29.9 | 0.07 | 0.06 | 26.2 | 0.02 | 0.06 |
| Calcium channel blocking agent                     | Yes | 21.8 | 23.2 | 0.03 | 0.01 | 23.5 | 0.04 | 0.02 | 22.9 | 0.03 | 0.02 | 23.4 | 0.04 | 0.02 |
| Centrally-acting antiadrenergic agent or reserpine | Yes | 4.0  | 3.4  | 0.03 | 0.04 | 3.9  | 0.00 | 0.04 | 3.4  | 0.03 | 0.03 | 2.4  | 0.09 | 0.04 |
| CYP2C19 inhibitor                                  | Yes | 1.9  | 1.9  | 0.00 | 0.02 | 2.4  | 0.03 | 0.02 | 2.5  | 0.04 | 0.02 | 2.0  | 0.01 | 0.02 |
| CYP3A4 inhibitor                                   | Yes | 8.2  | 6.8  | 0.05 | 0.03 | 8.4  | 0.01 | 0.02 | 7.6  | 0.02 | 0.03 | 8.2  | 0.00 | 0.03 |
| CYP3A4 inducer                                     | Yes | 6.2  | 6.8  | 0.02 | 0.02 | 7.0  | 0.03 | 0.03 | 6.1  | 0.00 | 0.02 | 6.3  | 0.01 | 0.02 |
| CYP1A2 inhibitor                                   | Yes | 2.4  | 2.1  | 0.02 | 0.02 | 2.6  | 0.01 | 0.02 | 2.3  | 0.01 | 0.01 | 2.7  | 0.02 | 0.02 |
| CYP2B6 inhibitor                                   | Yes | 0.1  | 0.1  | 0.01 | 0.01 | 0.2  | 0.02 | 0.02 | 0.2  | 0.02 | 0.02 | 0.2  | 0.03 | 0.01 |
| CYP2B6 inducer                                     | Yes | 2.2  | 1.5  | 0.05 | 0.01 | 2.4  | 0.02 | 0.04 | 2.0  | 0.01 | 0.02 | 1.8  | 0.03 | 0.03 |
| Dipyridamole                                       | Yes | 0.7  | 0.7  | 0.01 | 0.01 | 0.7  | 0.00 | 0.01 | 0.8  | 0.01 | 0.01 | 0.7  | 0.00 | 0.02 |

|                                                 |     |      |      |      |      |      |      |      |      |      |      |      |      |      |
|-------------------------------------------------|-----|------|------|------|------|------|------|------|------|------|------|------|------|------|
| Estrogen                                        | Yes | 1.8  | 2.2  | 0.03 | 0.03 | 2.7  | 0.06 | 0.03 | 2.1  | 0.02 | 0.01 | 3.0  | 0.08 | 0.04 |
| Influenza vaccination                           | Yes | 2.4  | 3.0  | 0.04 | 0.01 | 2.3  | 0.01 | 0.01 | 2.7  | 0.02 | 0.03 | 2.8  | 0.02 | 0.02 |
| NSAID                                           | Yes | 12.0 | 15.9 | 0.11 | 0.06 | 17.5 | 0.16 | 0.04 | 13.2 | 0.04 | 0.06 | 18.7 | 0.19 | 0.05 |
| Oral contraceptive                              | Yes | 0.1  | 0.2  | 0.02 | 0.01 | 0.2  | 0.02 | 0.02 | 0.1  | 0.01 | 0.02 | 0.1  | 0.01 | 0.02 |
| Renin angiotensin system antagonist             | Yes | 36.6 | 41.3 | 0.10 | 0.05 | 38.7 | 0.04 | 0.04 | 39.6 | 0.06 | 0.05 | 39.4 | 0.06 | 0.06 |
| Statin                                          | Yes | 31.2 | 38.1 | 0.15 | 0.08 | 31.9 | 0.02 | 0.03 | 37.1 | 0.13 | 0.05 | 33.5 | 0.05 | 0.06 |
| Thiazide diuretic                               | Yes | 6.7  | 8.4  | 0.07 | 0.01 | 7.8  | 0.04 | 0.02 | 6.5  | 0.01 | 0.03 | 8.0  | 0.05 | 0.03 |
| Vasodilator                                     | Yes | 19.7 | 16.8 | 0.07 | 0.06 | 19.0 | 0.02 | 0.04 | 18.7 | 0.03 | 0.04 | 18.3 | 0.03 | 0.06 |
| Warfarin                                        | Yes | 4.0  | 2.9  | 0.06 | 0.06 | 3.3  | 0.03 | 0.03 | 3.4  | 0.03 | 0.03 | 2.2  | 0.10 | 0.03 |
| <i>Acutely-occurring diseases</i>               |     |      |      |      |      |      |      |      |      |      |      |      |      |      |
| Cytomegaloviral disease                         | Yes | 0.0  | 0.1  | 0.01 | 0.02 | 0.1  | 0.01 | 0.02 | 0.0  | 0.02 | 0.02 | 0.0  | 0.02 | 0.02 |
| Helicobacter pylori                             | Yes | 0.9  | 0.7  | 0.02 | 0.03 | 1.2  | 0.03 | 0.02 | 0.7  | 0.02 | 0.02 | 1.0  | 0.01 | 0.01 |
| Herpes simplex                                  | Yes | 0.3  | 0.3  | 0.01 | 0.02 | 0.3  | 0.00 | 0.01 | 0.2  | 0.01 | 0.02 | 0.4  | 0.01 | 0.02 |
| Fever                                           | Yes | 6.9  | 3.4  | 0.16 | 0.07 | 5.1  | 0.08 | 0.07 | 4.4  | 0.11 | 0.06 | 2.6  | 0.20 | 0.06 |
| Gingival and periodontal disease                | Yes | 0.2  | 0.2  | 0.01 | 0.01 | 0.2  | 0.00 | 0.01 | 0.2  | 0.00 | 0.01 | 0.2  | 0.01 | 0.01 |
| Infection, acute respiratory                    | Yes | 10.8 | 12.5 | 0.05 | 0.05 | 12.0 | 0.04 | 0.04 | 9.8  | 0.03 | 0.05 | 12.8 | 0.06 | 0.04 |
| Infection, serious (coded in other diseases**)† | Yes | 26.5 | 18.0 | 0.21 | 0.08 | 23.1 | 0.08 | 0.07 | 20.5 | 0.14 | 0.07 | 17.1 | 0.23 | 0.12 |
| Infection, urinary tract                        | Yes | 21.0 | 14.1 | 0.18 | 0.07 | 18.5 | 0.06 | 0.04 | 16.0 | 0.13 | 0.06 | 14.0 | 0.19 | 0.10 |
| Infectious and parasitic diseases, all other†   | Yes | 29.5 | 22.3 | 0.17 | 0.08 | 27.1 | 0.05 | 0.08 | 25.1 | 0.10 | 0.07 | 20.6 | 0.21 | 0.11 |
| Pneumonia                                       | Yes | 14.5 | 7.0  | 0.25 | 0.10 | 10.4 | 0.12 | 0.09 | 9.0  | 0.17 | 0.09 | 6.2  | 0.27 | 0.10 |

SMD = standardized mean difference (vs. pantoprazole); WCSD = weighted conditional standardized difference (vs. pantoprazole); PPI = proton pump inhibitor; CMS = Centers for Medicare and Medicaid Services; COPD = chronic obstructive pulmonary disease; CAO = coronary artery occlusion; HIV = human immunodeficiency virus; AIDS = acquired immune deficiency syndrome; MI = myocardial infarction; ICD = implantable cardioverter-defibrillator; MAOI = monoamine oxidase inhibitor; SNRI = serotonin and norepinephrine reuptake inhibitor; SSRI = selective serotonin reuptake inhibitor; NSAID = nonsteroidal anti-inflammatory drug

\* not considered in the propensity score

\*\* not already coded within *Infectious and parasitic diseases*

† baseline covariate, in addition to propensity score, included in the proportional-hazards model for the sensitivity analysis to control for potential residual imbalance in exposure groups

**Supplemental Table II.** High-level summary of other publications that have reported the association between clopidogrel + proton pump inhibitors (PPIs) and stroke, as a sole outcome

| First author<br>[PubMed identifier]               | Design* | Setting                                                                                                        | Exposure                                             | N**    | Outcome                            | Reported risk by PPI?                         | Result                                                                                                                                                                                                                                                                                                                                           |
|---------------------------------------------------|---------|----------------------------------------------------------------------------------------------------------------|------------------------------------------------------|--------|------------------------------------|-----------------------------------------------|--------------------------------------------------------------------------------------------------------------------------------------------------------------------------------------------------------------------------------------------------------------------------------------------------------------------------------------------------|
| van Boxel et al <sup>1</sup><br>[20736935]        | C       | Netherlands; Dutch health insurance data; 2006-7                                                               | clopidogrel + PPI vs. clopidogrel                    | 5,734  | stroke (2°)                        | NO                                            | aHR = 1.13 (0.78-1.65)                                                                                                                                                                                                                                                                                                                           |
| Bhatt et al <sup>2</sup><br>[20925534]            | RCT***  | International; Clopidogrel and the Optimization of Gastrointestinal Events Trial (COGENT); phase 3 trial; 2008 | (clopidogrel + omeprazole)+ASA vs. clopidogrel + ASA | 1,876  | ischemic stroke (2°) at 180 days   | NO                                            | log-rank p-value for difference in event rate between exposure groups = 0.43                                                                                                                                                                                                                                                                     |
| Muñoz-Torrero et al <sup>3</sup><br>[21164357]    | C       | Spain; multicenter registry; 2003-9                                                                            | clopidogrel + PPI vs. clopidogrel                    | 519    | ischemic stroke (2°)               | NO                                            | uRR = 1.9 (1.03-3.7)                                                                                                                                                                                                                                                                                                                             |
| Mahabaleshwarkar et al <sup>4</sup><br>[23362935] | C-C     | US; Medicare elders (5% national sample); 2006-8                                                               | clopidogrel + PPI vs. clopidogrel                    | 15,415 | stroke (2°)                        | NO                                            | aOR = 1.05 (0.86-1.28)                                                                                                                                                                                                                                                                                                                           |
| Tanaka et al <sup>5</sup><br>[22445597]           | C-X     | Japan; consecutive hospitalized persons; 2006-10                                                               | clopidogrel + ASA + PPI vs. ticlopidine + ASA + PPI  | 278    | stroke (2°) at 30 days             | NO                                            | p-value for difference in event proportions between exposure groups = 0.19                                                                                                                                                                                                                                                                       |
| Chitose et al <sup>6</sup><br>[22130313]          | C       | Japan; multicenter registry; 2008-9                                                                            | clopidogrel + ASA + PPI vs. clopidogrel + ASA        | 187    | ischemic stroke (sub of 1°)        | NO                                            | log-rank p-value for difference in event proportions between exposure groups = 0.60                                                                                                                                                                                                                                                              |
| Charlot et al <sup>7</sup><br>[20855802]          | C       | Denmark; national registry; 2000-6                                                                             | clopidogrel + PPI vs. clopidogrel                    | 6,753  | stroke (2°) at 1 year              | NO                                            | aHR = 1.78 (1.47-2.16)                                                                                                                                                                                                                                                                                                                           |
| Simon et al <sup>8</sup><br>[21262992]            | C       | France; multicenter registry; 2005                                                                             | clopidogrel + PPI vs. clopidogrel                    | 1,453  | stroke (sub of 1°) while inpatient | YES, but compared to a PPI-unexposed referent | aOR (clopidogrel + PPI vs. clopidogrel) = 0.33 (0.12-0.92)<br>aOR (clopidogrel + omeprazole vs. clopidogrel) = 0.14 (0.03-0.67)<br>aOR (clopidogrel + esomeprazole vs. clopidogrel) = 0.54 (0.14-2.16)<br>aOR (clopidogrel + pantoprazole vs. clopidogrel) = 1.78 (0.36-8.83)<br>aOR (clopidogrel + lansoprazole vs. clopidogrel) = incalculable |
| Kreutz et al <sup>9</sup><br>[20653354]           | C       | US; Medco Health Solutions benefits claims; 2005-6                                                             | clopidogrel +PPI vs. clopidogrel                     | 6,828  | stroke/TIA (sub of 1°) at 1 year   | NO                                            | aHR = 1.48 (1.08-2.01)                                                                                                                                                                                                                                                                                                                           |
| Ray et al <sup>10</sup><br>[20231564]             | C       | US; Tennessee Medicaid; 1999-2005                                                                              | clopidogrel +PPI vs. clopidogrel                     | 7,593  | stroke (sub of 1°)                 | NO                                            | aHR (overall) = 1.21 (0.82-1.78)<br>aHR (if stented) = 0.97 (0.50-1.90)                                                                                                                                                                                                                                                                          |
| Aihara et al <sup>11</sup><br>[22234956]          | C       | Japan; multicenter registry; 2006-9                                                                            | clopidogrel + ASA + PPI vs. clopidogrel + ASA        | 500    | stroke (2°)                        | NO                                            | aHR = 1.21 (0.48-3.19)                                                                                                                                                                                                                                                                                                                           |

\* C = cohort; C-C = case-control; C-X = cross-sectional; RCT = randomized controlled trial

\*\* Persons in the antiplatelet + PPI arm

\*\*\* terminated

aHR = adjusted hazard ratio; ASA = aspirin; uRR = unadjusted rate ratio; US = United States; aOR = adjusted odds ratio; TIA = transient ischemic attack

## REFERENCES

- (1) van Boixel OS, van Oijen MG, Hagenaaers MP, Smout AJ, Siersema PD. Cardiovascular and gastrointestinal outcomes in clopidogrel users on proton pump inhibitors: results of a large Dutch cohort study. *Am J Gastroenterol* . 2010;105:2430-6.
- (2) Bhatt DL, Cryer BL, Contant CF, Cohen M, Lanos A, Schnitzer TJ, et al. Clopidogrel with or without omeprazole in coronary artery disease. *N Engl J Med* . 2010;363:1909-1917.
- (3) Munoz-Torrero JF, Escudero D, Suarez C, Sanclemente C, Pascual MT, Zamorano J, et al. Concomitant use of proton pump inhibitors and clopidogrel in patients with coronary, cerebrovascular, or peripheral artery disease in the factores de Riesgo y ENfermedad Arterial (FRENA) registry. *J Cardiovasc Pharmacol* . 2011;57:13-19.
- (4) Mahabaleshwarkar RK, Yang Y, Datar MV, Bentley JP, Strum MW, Banahan BF, et al. Risk of adverse cardiovascular outcomes and all-cause mortality associated with concomitant use of clopidogrel and proton pump inhibitors in elderly patients. *Curr Med Res Opin* . 2013;29:315-323.
- (5) Tanaka A, Sakakibara M, Okumura S, Okada K, Ishii H, Murohara T. Comparison of early outcomes after primary stenting in Japanese patients with acute myocardial infarction between clopidogrel and ticlopidine in concomitant use with proton-pump inhibitor. *J Cardiol* . 2012;60:7-11.
- (6) Chitose T, Hokimoto S, Oshima S, Nakao K, Fujimoto K, Miyao Y, et al. Clinical outcomes following coronary stenting in Japanese patients treated with and without proton pump inhibitor. *Circ J* . 2012;76:71-78.
- (7) Charlot M, Ahlehoff O, Norgaard ML, Jorgensen CH, Sorensen R, Abildstrom SZ, et al. Proton-pump inhibitors are associated with increased cardiovascular risk independent of clopidogrel use: a nationwide cohort study. *Ann Intern Med* . 2010;153:378-386.
- (8) Simon T, Steg PG, Gilard M, Blanchard D, Bonello L, Hanssen M, et al. Clinical events as a function of proton pump inhibitor use, clopidogrel use, and cytochrome P450 2C19 genotype in a large nationwide cohort of acute myocardial infarction: results from the French Registry of Acute ST-Elevation and Non-ST-Elevation Myocardial Infarction (FAST-MI) registry. *Circulation* . 2011;123:474-482.
- (9) Kreutz RP, Stanek EJ, Aubert R, Yao J, Breall JA, Desta Z, et al. Impact of proton pump inhibitors on the effectiveness of clopidogrel after coronary stent placement: the clopidogrel Medco outcomes study. *Pharmacotherapy* . 2010;30:787-796.
- (10) Ray WA, Murray KT, Griffin MR, Chung CP, Smalley WE, Hall K, et al. Outcomes with concurrent use of clopidogrel and proton-pump inhibitors: a cohort study. *Ann Intern Med* . 2010;152:337-345.
- (11) Aihara H, Sato A, Takeyasu N, Nishina H, Hoshi T, Akiyama D, et al. Effect of individual proton pump inhibitors on cardiovascular events in patients treated with clopidogrel following coronary stenting: results from the Ibaraki Cardiac Assessment Study Registry. *Catheter Cardiovasc Interv* . 2012;80:556-563.
