# Supplementary material
Source: PubMed Central journal article supplement (PMC4342326)
Supplement: NIHMS654214-supplement-2.pdf [file NIHMS654214-supplement-2.pdf]

**Acknowledgment Permission Form**

Journal | Stroke  
Manuscript No. | Not yet assigned  
First author | Charles E Leonard  
Title of work | Comparative risk of isc

**Acknowledgment Permission:**

Authors must provide written permission/approval from all individuals mentioned by name in the Acknowledgments section of a submitted manuscript. By signing this form, any and all acknowledged persons therefore state that they have read and approved the mention of their names in the Acknowledgment section of the aforementioned paper.

Printed Name | Max Haslin  
Signature |   
Date | 7/29/2014

Printed Name | Liu Qing  
Signature |   
Date | 7/28/2014

Printed Name | Xu Han  
Signature |   
Date | 7/28/2014

Printed Name | Hanlefi Rezzaghi  
Signature | 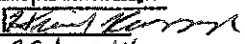  
Date | 7/29/2014
